# Supplementary material for: Selective conversion of trioses to lactates over Lewis acid heterogeneous catalysts
Source: Royal Society of Chemistry journal article supplement (doi:10.1039/c0gc00923g), 2011-01-01
Supplement: c0gc00923g.pdf [file c0gc00923g.pdf]

## Selective conversion of trioses to lactates over Lewis acid heterogeneous catalysts

L. Li, C. Stroobants, K. Lin, P. A. Jacobs, B. F. Sels, P. P. Pescarmona

### Supplementary Information

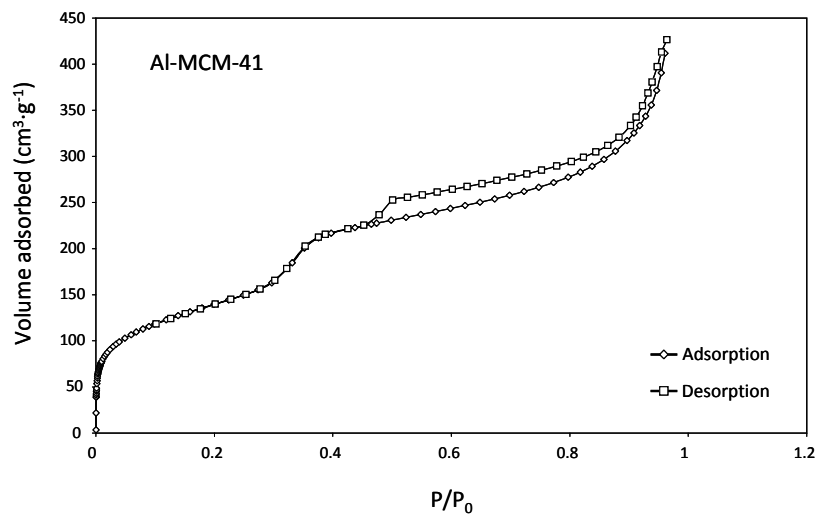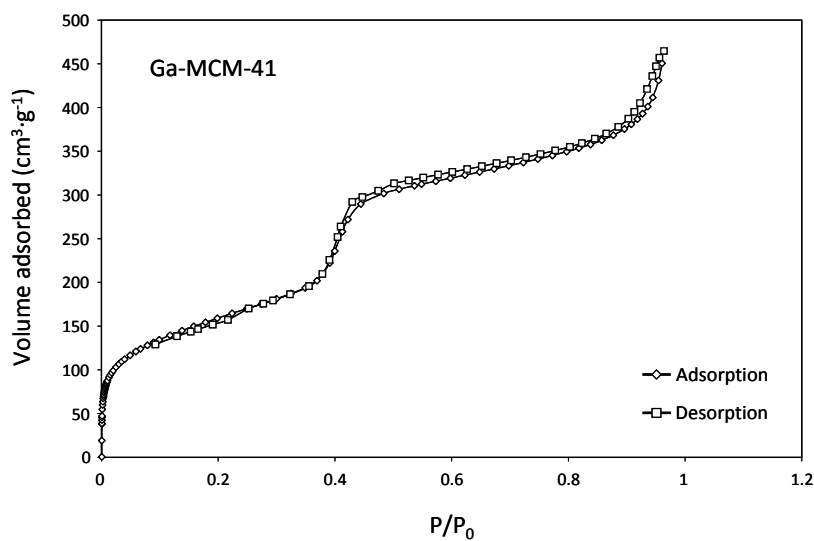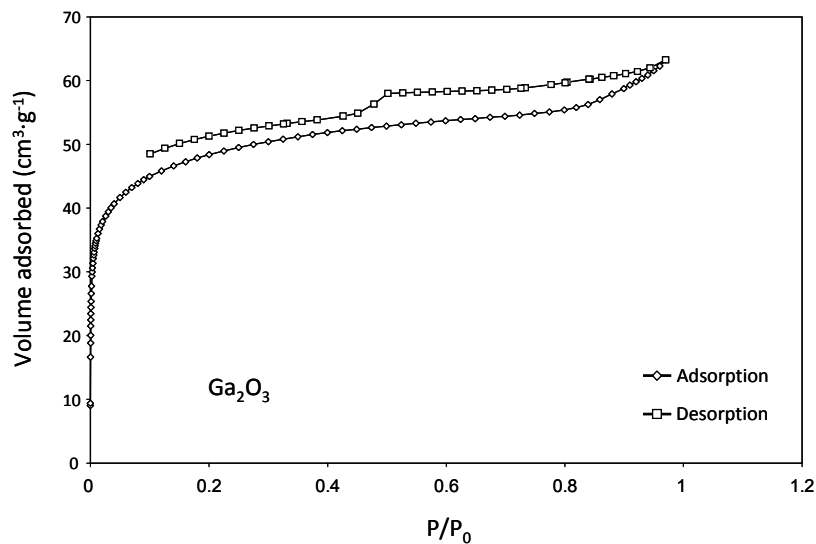

Supplementary Material (ESI) for Green Chemistry

This journal is (c) The Royal Society of Chemistry 2011

Figure SI. N<sub>2</sub> adsorption/desorption isotherms of Al-MCM-41, Ga-MCM-41 and Ga<sub>2</sub>O<sub>3</sub>.
